# Supplementary material for: Exogenous Nitric Oxide Alleviates the Damage Caused by Tomato Yellow Leaf Curl Virus in Tomato through Regulation of Peptidase Inhibitor Genes
Source: Int J Mol Sci. 2022 Oct 19;23(20):12542. doi: 10.3390/ijms232012542 (PMC9604136; doi:10.3390/ijms232012542)
Supplement: Supplementary file 1 [file ijms-23-12542-s001.zip › Table S1-S6.xlsx]

## Sheet: Table S1
Table S1 Gene primers used for RT-qPCR
Gene ID	Gene name	Primer Sequence(5'-3')
Solyc09g065910.2	PSBW	F：CTCGTGCAAAGGGGATCTGTA
		R：GCCATTGCTACTGGGCTTGA
Solyc06g074200.3	PSAO	F：CCAGTGACAGCAAGAAACCCT
		R：AGCAGGTCCAGTGGGGAAAT
Solyc07g047850.3	CAB4	F：GGTGATTCATTGCCGTTGGG
		R：AGCATGGACAAGGTTTGGGT
Solyc09g007020.2	PR1B1	F：GGGTGTCGGAAAAGCCAAAC
		R：GTCCGACCCAATTGCCTACA
Solyc12g096960.2	STH-2	F：TCATTGACGACAAGAACATGGTA
		R：GTCTTGCAAATGCACCCTCC
Solyc04g079420.3	At4g33300	F：AAAGCGATTGGTTATGCCGC
		R：TGTATGCACAGAGATGACTCGT
Solyc01g105880.3	TPS3	F：AAAGGGGTGACGTTCCCAAG
		R：CATGCAATGTGCTGTTGTTGC
Solyc10g017570.3	MNR1	F：ACTTCCACCAATAAAGTCAAATGGA
		R：GTGGAACAAAGGCATCAACCA
Solyc10g076240.2	PER70	F：CAAAGCCAATTGTCCACGCA
		R：GAGAAACTCCCGAGGTTGGT
Solyc02g092580.3	PER51	F：AGGGAACACAGCTGAGAAGG
		R：TCTCTGGTGGCTAAAGCGAG
Solyc05g052280.3	PER52	F：TGCACAACATTTAGGGCACG
		R：GTTGTCACCTGAGCCTGAGT
Solyc09g065780.3	KCS11	F：CTGAGGCGAAAGGTAGGGTG
		R：AAGCAACGAATAGGTCCGGG
Solyc12g096780.2	At3g45770	F：GAGCTACAAGCATAGTAGGGCA
		R：ACATCTTTGACTTCGAGTTCACTT
Solyc03g005320.3	KCS11	F：AGTACGTACACACAAGGGCG
		R：TCCCCTGCAACAGCCATTAG
Solyc01g067740.3	SODCC.5	F：GGCACCATCCTCTTCACTCAA
		R：GGTATCACCAAGGGCATGGA
Solyc02g083630.3	APX3	F：GGCGCCACAAGTAGATGAGA
		R：GGGATGCGTACGCTAAACGA
Solyc11g072920.2	pod	F：TCCGATGCACGTATTGGAGC
		R：TCAACGACGTCGAAACCTCT
Solyc11g013110.2	FL	F：GCAAAGAAGGAAGGGGCAAA
		R：AGCAGGAGGAGGCCAAATCT
Solyc11g022590.1	KTI5	F：TGTGCCATATGGAAAGGGCT
		R：GCAGCCAAGCGTCTAACTTG
Solyc03g098790.2	CDI	F：GAACTGTCGGTACACCCGTT
		R：TATGCTTCCTCCCGTCTCCA
	C1	F:ATGCCTCGTTTATTTAAAATATATGCCAAAA
		R:TTACGCCTTATTGGTTTCTTCTTGG
	C2	F:ATGCAACCTTCGTCACCCTC
		R:CTAAATACTCTTAAGAAATGACCAGTCTGAGG
	C4	F:TTAATATATTGAGGGCCTCGGATTTATTGCC
		R:ATGGGGAACCACATCTCCATGT
	V2	F:ATGTGGGACCCACTTCTAAATGA
		R:TCAGGGCTTCGATACATTCTGT
	CP	F:ATGTCGAAGCGACCAGGC
		R:TTAATTTGATATTGAATCATAGAAATAGATGCGTA
reference gene	UBI	F:TCGTAAGGAGTGCCCTAATGCTGA
		R:CAATCGCCTCCAGCCTTGTTGTAA

## Sheet: Table S2
Table S2 Data filtering statistics table
Sample	RawDatas	CleanData(%)	Adapter(%)	LowQuality(%)	polyA(%)	N(%)
CK-1	51603456	51515618 (99.83%)	13288 (0.03%)	74550 (0.14%)	0 (0.00%)	0 (0.00%)
CK-2	51233082	51148168 (99.83%)	12734 (0.02%)	72180 (0.14%)	0 (0.00%)	0 (0.00%)
CK-3	46416824	46341054 (99.84%)	10932 (0.02%)	64838 (0.14%)	0 (0.00%)	0 (0.00%)
TYLCV-1	48113254	48037216 (99.84%)	12284 (0.03%)	63754 (0.13%)	0 (0.00%)	0 (0.00%)
TYLCV-2	52591438	52492926 (99.81%)	14224 (0.03%)	84288 (0.16%)	0 (0.00%)	0 (0.00%)
TYLCV-3	47254546	47175680 (99.83%)	11398 (0.02%)	67468 (0.14%)	0 (0.00%)	0 (0.00%)
TYLCV_NO-1	58391834	58290818 (99.83%)	13890 (0.02%)	87126 (0.15%)	0 (0.00%)	0 (0.00%)
TYLCV_NO-2	46000170	45922444 (99.83%)	12898 (0.03%)	64828 (0.14%)	0 (0.00%)	0 (0.00%)
TYLCV_NO-3	45353986	45279192 (99.84%)	12572 (0.03%)	62222 (0.14%)	0 (0.00%)	0 (0.00%)

## Sheet: Table S3
Base information statistics table				Table S3 Base information statistics table
Sample	RawData(bp)	BF_Q20(%)	BF_Q30(%)	BF_N(%)	BF_GC(%)	CleanData(bp)	AF_Q20(%)	AF_Q30(%)	AF_N(%)	AF_GC(%)
CK-1	7740518400	7590945062 (98.07%)	7286931488 (94.14%)	13022 (0.00%)	3343325318 (43.19%)	7699638838	7557092336 (98.15%)	7256323513 (94.24%)	12954 (0.00%)	3322171277 (43.15%)
CK-2	7684962300	7541988806 (98.14%)	7246870514 (94.30%)	12986 (0.00%)	3309976970 (43.07%)	7640113853	7503907993 (98.22%)	7212394345 (94.40%)	12906 (0.00%)	3287005594 (43.02%)
CK-3	6962523600	6831195372 (98.11%)	6560496367 (94.23%)	11484 (0.00%)	3003931233 (43.14%)	6922513542	6797147645 (98.19%)	6529626752 (94.32%)	11425 (0.00%)	2983452078 (43.10%)
TYLCV-1	7216988100	7080622370 (98.11%)	6800909835 (94.23%)	12467 (0.00%)	3078125917 (42.65%)	7176490318	7046525293 (98.19%)	6770167761 (94.34%)	12389 (0.00%)	3057758538 (42.61%)
TYLCV-2	7888715700	7742268144 (98.14%)	7443023232 (94.35%)	13358 (0.00%)	3394084325 (43.02%)	7841755502	7702684331 (98.23%)	7407166331 (94.46%)	13278 (0.00%)	3369877086 (42.97%)
TYLCV-3	7088181900	6956297452 (98.14%)	6687884289 (94.35%)	12000 (0.00%)	3040988786 (42.90%)	7051220804	6925495775 (98.22%)	6660068516 (94.45%)	11937 (0.00%)	3022045987 (42.86%)
TYLCV_NO-1	8758775100	8595754132 (98.14%)	8262050421 (94.33%)	14894 (0.00%)	3762277539 (42.95%)	8706572116	8551869503 (98.22%)	8222352794 (94.44%)	14810 (0.00%)	3735406227 (42.90%)
TYLCV_NO-2	6900025500	6770600478 (98.12%)	6504745900 (94.27%)	11698 (0.00%)	2942055457 (42.64%)	6865045715	6741403118 (98.20%)	6478419723 (94.37%)	11639 (0.00%)	2923814226 (42.59%)
TYLCV_NO-3	6803097900	6681777117 (98.22%)	6428798510 (94.50%)	11648 (0.00%)	2903539846 (42.68%)	6769654363	6653924553 (98.29%)	6403689701 (94.59%)	11591 (0.00%)	2886390685 (42.64%)

## Sheet: Table S4
Table S4 Alignments of ribosome statistics
Sample	clean_reads	Mapped_Reads(%)	Unmapped_Reads(%)
CK-1	51515618	88632 ( 0.17% )	51426986 ( 99.83% )
CK-2	51148168	82534 ( 0.16% )	51065634 ( 99.84% )
CK-3	46341054	110482 ( 0.24% )	46230572 ( 99.76% )
TYLCV-1	48037216	96162 ( 0.20% )	47941054 ( 99.80% )
TYLCV-2	52492926	122510 ( 0.23% )	52370416 ( 99.77% )
TYLCV-3	47175680	92200 ( 0.20% )	47083480 ( 99.80% )
TYLCV_NO-1	58290818	126664 ( 0.22% )	58164154 ( 99.78% )
TYLCV_NO-2	45922444	156444 ( 0.34% )	45766000 ( 99.66% )
TYLCV_NO-3	45279192	145996 ( 0.32% )	45133196 ( 99.68% )

## Sheet: TableS5
Table S5 Statistics for alignments reference genomes
Sample	Total	Unmapped(%)	Unique_Mapped(%)	Multiple_Mapped(%)	Total_Mapped(%)
CK-1	51426986	1624380 (3.16%)	48893421 (95.07%)	909185 (1.77%)	49802606 (96.84%)
CK-2	51065634	1644125 (3.22%)	48527632 (95.03%)	893877 (1.75%)	49421509 (96.78%)
CK-3	46230572	1465960 (3.17%)	43933224 (95.03%)	831388 (1.80%)	44764612 (96.83%)
TYLCV-1	47941054	1672708 (3.49%)	45510531 (94.93%)	757815 (1.58%)	46268346 (96.51%)
TYLCV-2	52370416	1806059 (3.45%)	49693636 (94.89%)	870721 (1.66%)	50564357 (96.55%)
TYLCV-3	47083480	1788301 (3.80%)	44541437 (94.60%)	753742 (1.60%)	45295179 (96.20%)
TYLCV_NO-1	58164154	1897917 (3.26%)	55189254 (94.89%)	1076983 (1.85%)	56266237 (96.74%)
TYLCV_NO-2	45766000	1579166 (3.45%)	43368178 (94.76%)	818656 (1.79%)	44186834 (96.55%)
TYLCV_NO-3	45133196	1516849 (3.36%)	42822445 (94.88%)	793902 (1.76%)	43616347 (96.64%

## Sheet: Table S6
Table S6 Validation of DEGs by qRT-PCR analysis
Gene-ID	Symbol	log2FC		2- ∆ ∆Ct
		CK vs TYLCV	TYLCV vs TYLCV+NO	CK	TYLCV	TYLCV+NO
Solyc09g065910.2	PSBW	-0.13058	0.182948	1±0.2	0.97±0.23	1.85±0.34
Solyc06g074200.3	PSAO	-0.476487	0.292161	1±0.08	0.91±0.04	1.31±0.12
Solyc07g047850.3	CAB4	-0.438772	0.11313	1±0.09	0.35±0.03	0.7±0.07
Solyc09g007020.2	PR1B1	1.79236	0.720049	1±0.04	1.04±0.12	1.51±0.12
Solyc12g096960.2	STH-2	1.52928	0.937182	1±0.05	6.45±0.42	12.06±0.79
Solyc04g079420.3	At4g33300	-1.16952	0.96846	1±0.19	0.76±0.12	1.49±0.27
Solyc01g105880.3	TPS3	-0.862496	1.32193	1±0.08	0.21±0.01	0.84±0.08
Solyc10g017570.3	MNR1	-0.064572	1.19455	1±0.01	1.75±0.06	3.94±0.15
Solyc10g076240.2	PER70	-2.66297	6.05166	1±0.07	1.43±0.18	1.99±0.17
Solyc02g092580.3	PER51	-1.90069	1.87378	1±0.03	0.27±0.01	0.9±0.02
Solyc05g052280.3	PER52	0.434737	1.76867	1±0.03	1.06±0.02	4.76±0.05
Solyc09g065780.3	KCS11	-3.23909	2.11597	1±0.02	0.12±0	0.27±0.01
Solyc12g096780.2	At3g45770	0.215392	2.0332	1±0.03	1.12±0.03	4.42±0.06
Solyc03g005320.3	KCS11	-1.28582	1.67862	1±0.04	0.43±0.04	0.81±0.05
Solyc01g067740.3	SODCC.5	0.0956518	0.148363	1±0.04	1.01±0.04	1.2±0.07
Solyc02g083630.3	APX3	1.56887	-0.93333	1±0.02	1.5±0.04	1.1±0.02
Solyc11g072920.2	pod	2.58496	-1.36257	1±0.08	1.17±0.22	1.8±0.24
Solyc11g013110.2	FL	0.80475	-1.22425	1±0.07	2.1±0.24	0.96±0.13
Solyc11g022590.1	KTI5	-0.64801	1.07507	1±0.02	0.75±0.04	1.43±0.04
Solyc03g098790.2	CDI	0.916446	2.08316	1±0.11	7.44±0.73	57.88±7.71
