# Supplementary figures and images for: Exogenous Nitric Oxide Alleviates the Damage Caused by Tomato Yellow Leaf Curl Virus in Tomato through Regulation of Peptidase Inhibitor Genes
Source: MDPI journal article supplement (doi:10.3390/ijms232012542), 2022-10-19

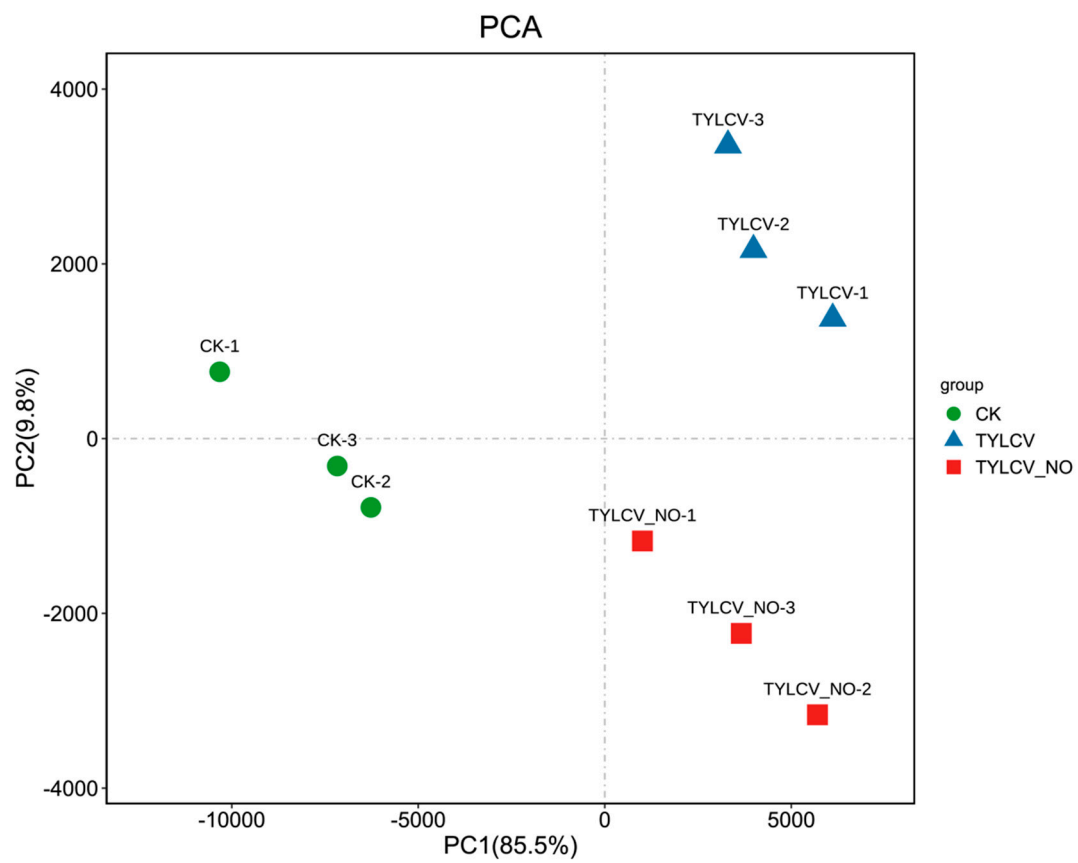

Figure S1 Sample principal component analysis

Supplement: s1 [file s1]
